# 1 City-wide metagenomics uncover antibiotic resistance reservoirs in urban beach and sewage waters

2  
3 Pablo Fresia<sup>1,2</sup>, Verónica Antelo<sup>1,2,#</sup>, Cecilia Salazar<sup>1,2,#</sup>, Matías Giménez<sup>1,3</sup>, Bruno D'Alessandro<sup>4</sup>, Ebrahim  
4 Afshinneko<sup>5,6</sup>, Christopher Mason<sup>5,6,7</sup>, Gastón H Gonnet<sup>2,8,9</sup>, Gregorio Iraola<sup>1,2,10,\*</sup>

- 5  
6 1 Unidad de Bioinformática, Institut Pasteur Montevideo, Montevideo, Uruguay.  
7 2 Proyecto “Centro de Metagenómica”, Institut Pasteur Montevideo, Montevideo, Uruguay.  
8 3 Unidad de Microbiología Molecular, Instituto de Investigaciones Biológicas Clemente Estable, Montevideo, Uruguay.  
9 4 Laboratorio de Calidad Ambiental, Intendencia Municipal de Montevideo, Montevideo, Uruguay.  
10 5 Department of Physiology and Biophysics, Weill Cornell Medicine, New York, USA.  
11 6 The HRH Prince Alwaleed Bin Talal Bin Abdelaziz Alsaud Institute for Computational Biomedicine, Weill Cornell Medicine, New York, USA.  
12 7 The Feil Family Brain and Mind Research Institute, Weill Cornell Medicine, New York, USA.  
13 8 ETH Zurich, Computer Science, Switzerland.  
14 9 SIB Swiss Institute of Bioinformatics, Lausanne, Switzerland.  
15 10 Centro de Biología Integrativa, Universidad Mayor, Santiago de Chile, Chile.

16  
17 \* Corresponding author: Gregorio Iraola, Unidad de Bioinformática, Institut Pasteur Montevideo. Mataojo 2020 (PO 11400), Montevideo, Uruguay. E-  
18 mail: [giraola@pasteur.edu.uy](mailto:giraola@pasteur.edu.uy).

19  
20 # Author’s equal contribution

21  
22  
23  
24  
25  
26  
27  
28  
29  
30  
31  
32  
33  
34  
35  
36  
37  
38  
39

40 **Abstract**

41

42 **Background:** Microbial communities present in environmental waters constitute a reservoir for antibiotic-  
43 resistant pathogens that impact human health. For this reason a diverse variety of water environments are  
44 being analyzed using metagenomics to uncover public health threats. However, the composition of these  
45 communities along the coastal environment of a whole city where sewage and beach waters are mixed, is  
46 poorly understood.

47

48 **Results:** We shotgun-sequenced 20 coastal areas from the city of Montevideo (capital of Uruguay) including  
49 beach and sewage water samples to characterize bacterial communities and their virulence and antibiotic  
50 resistance repertoires. We found that sewage and beach environments presented significantly different  
51 bacterial communities. Sewage waters harbored a higher prevalence and a more diverse repertoire of virulence  
52 and antibiotic resistant genes mainly from well-known enterobacteria, including carbapenemases and  
53 extended-spectrum betalactamases reported in hospital infections in Montevideo. Additionally, we were able  
54 to genotype the presence of both globally-disseminated pathogenic clones as well as emerging antibiotic-  
55 resistant bacteria in sewage waters.

56

57 **Conclusions:** Our study represents the first in using metagenomics to jointly analyze beaches and the sewage  
58 system from an entire city, allowing us to characterize antibiotic-resistant pathogens circulating in urban  
59 waters. The data generated in this initial study represent a baseline metagenomic exploration to guide future  
60 longitudinal (time-wise) studies, whose systematic implementation will provide useful epidemiological  
61 information to improve public health surveillance.

62

63 **Keywords:** Sewage, Beach, Metagenomics, Taxonomy, Antimicrobial resistance, Bacterial pathogens.

64

65

66

67

68

69

70

71

72

73

74

75

## 76 **Introduction**

77  
78 Human activity shapes the microbial communities residing in urban environments. In particular,  
79 urban sewage systems are designed to evacuate human wastes from the houses to areas of low human  
80 exposure and gradually reinstate them into natural watercourses such as creeks, beaches or the sea. This cycle  
81 is of tremendous importance for public health as waste waters can be reservoir and vehicle for the  
82 transmission of pathogenic bacteria and antibiotic resistance mechanisms. Indeed, the rapid emergence and  
83 spread of pathogenic bacteria with extensive antibiotic resistance has been recognized by the World Health  
84 Organization as a top health issue [1], since water can easily move microorganisms between humans and  
85 other animal species. Accordingly, the analysis of environmental waters is being adopted as an effective  
86 method to monitor the dynamics of antibiotic resistant pathogens [2], as this kind of environments can play a  
87 role as important as clinical settings for the selection of antibiotic resistance [3].

88 Recent advances in high-throughput sequencing (HTS) and computational biology now allow the  
89 exploration of microbial communities based on culture-independent approaches using metagenomics. This  
90 enables us to quantify and functionally characterize environmental microbiomes with unprecedented precision  
91 and comprehensiveness [4]. Indeed, the very recent implementation of this methodology to explore the  
92 microbial diversity in the built environment is providing a completely new layer of information to be  
93 integrated in the management of cities, potentially assisting decisions that range from urban design to public  
94 health [5,6]. In particular, urban sewage or beach water systems have been previously characterized using  
95 metagenomics not only focused on uncovering ecological patterns [7] but also in characterizing pathogenic  
96 and antibiotic resistant bacteria [8,9]. However, the joint analysis of bacterial communities present at the same  
97 time in the sewage and beach waters from the same metropolitan area remains to be explored in depth.

98 Sewage waters have been shown to accurately reflect the population's gut microbiota composition  
99 [10], raising the possibility of using metagenomics to directly gain information about infection dynamics [11].  
100 Additionally, beaches are important for recreational use but also are frequently recognized as risky  
101 environments for the contagion and transmission of bacterial infections [12], particularly if they are  
102 constantly or sporadically impacted by sewage spillovers. Accordingly, we performed a cross-sectional  
103 shotgun metagenomic analysis along the urban coast of Montevideo, the capital of Uruguay, aiming to  
104 characterize bacterial communities present in the sewage and beach water. Our study represents the first of  
105 that kind in a South American city and is the kick-off towards the incorporation of metagenomics in the  
106 surveillance of microbiological risks at city scale.

107

## 108 **Results**

109

110 **Composition of sewage and beach communities.** First, we explored the structure of microbial communities  
111 present in our beach and sewage samples using a multiset k-mer counting approach. This strategy provides an  
112 unbiased view that is not affected by taxonomic or functional assignment, conversely, it just evaluates the  
113 differential abundance of unique DNA segments [13]. **Figure 1A** shows a clustering analysis based on this  
114 methodology that shows a complete discrimination between sewage and beach samples, suggesting  
115 substantial differences in the composition of communities in these environments. Second, we confirmed the  
116 observed discrimination from a taxonomic point of view by calculating relative abundances of bacterial  
117 species present in each sample using an approach based on the identification and quantification of marker  
118 genes [14]. **Figure 1B** shows a dendrogram based on beta diversities (between samples) calculated using the  
119 Bray-Curtis dissimilarity distance from the taxonomic profiles, showing a complete discrimination between  
120 beach and sewage. Beta diversity was 0.42 within sewage samples (SD = 0.23) and 0.41 within beach samples  
121 (SD = 0.22) but increased to 0.63 (SD = 0.12) when comparing sewage against beach samples. Alpha  
122 diversity (within samples) was calculated using the Shannon index and averaged 3.65 (SD = 0.64) for sewage  
123 and 3.7 (SD = 0.4) for beach samples (**Additional file 1: Fig. S1**). These results indicate that taxonomic  
124 composition of bacterial communities from these environments are substantially different and can  
125 discriminate between beach or sewage origin (geographic location of each sample along the coast of  
126 Montevideo is displayed in **Fig. 1C**).

127  
128 **Occurrence of antibiotic resistance genes (ARGs).** The presence of different microbial communities in  
129 sewage and beach samples led us to hypothesize they could also encode distinct ARG repertoires. Hence,  
130 metagenomic assemblies (**Additional file 2: Table S1**) were screened against the Comprehensive Antibiotic  
131 Resistance Database (CARD) [15] because is currently the most up-to-date and manually curated resource for  
132 ARGs detection. We found that 108 out of 2177 (~5%) ARGs had hits in our samples and they belong to 10  
133 different antibiotic classes (**Additional file 3: Table S2**), being the clinically relevant TEM-4 and TEM-33  
134 beta-lactamases the top occurring genes but aminoglycoside-modifying enzymes (like acetyl- or  
135 phosphotransferases) the most abundant class of ARGs. In particular, a significant difference ( $p = 0.002$ ,  
136 Mann-Whitney U test) in ARGs abundance and a significantly higher diversity ( $p = 0.0024$ , Mann-Whitney U  
137 test) of ARGs according to the Simpson's index were found in favor of sewage compared to beach samples  
138 (**Additional file 4: Fig. S2**). Furthermore, when inspecting antibiotic classes we observed that sewage samples  
139 encoded ARGs belonging to 90% of antibiotic classes found in these environments while beach samples only  
140 encoded 40% of antibiotic classes, evidencing a more complex composition of antibiotic resistance  
141 mechanisms in the urban sewage waters (**Fig. 2A**). Indeed, only elfamycin resistance was present in beach but  
142 absent in sewage samples. On the other side, the occurrence of resistance mechanisms for aminoglycosides,  
143 betalactams, tetracyclines, sulfonamides, macrolides and streptogramins was significantly greater ( $p < 0.01$ ,  
144 Mann-Whitney U test) in sewage compared to beach samples (**Fig. 2B**).

145

146 **Distribution of ARGs in mobile elements.** As a general trend, we found that ARGs present in our samples  
147 were more prevalent in plasmids than in bacterial chromosomes. Specifically, ARGs for sulfonamides,  
148 betalactams, aminoglycosides, phenicols, macrolides and streptogramins were more prevalent in plasmids  
149 than in bacterial chromosomes (Fig. 3A). Additionally, plasmids carrying ARGs found in our samples  
150 resulted to be extensively distributed among many clinically relevant enterobacteria like *E. coli*, *Salmonella*,  
151 *Klebsiella*, *Enterobacter*, *Citrobacter* and *Acinetobacter*, among others (Fig. 3B). ARGs for tetracyclines,  
152 lincosamides, fluoroquinolones and elfamycins were more frequently encoded in chromosomes.

153 We also looked for integrons and found a higher prevalence of them in sewage (74%) than in beach  
154 (24%) samples. Furthermore, clinically relevant integron classes 1, 2 and 3 were almost exclusively found in  
155 sewage samples (~90%) (Fig. 3C). Also, we were able to identify cassette ARGs with conserved *attC* sites  
156 associated to 24 out of 39 integrons (61%). These cassette genes mostly coded for multi-drug efflux pumps,  
157 but also we found carbapenemases (OXA family), GES extended-spectrum betalactamases (ESBLs), *aadA1*  
158 aminoglycoside nucleotidyltransferases, *cat* chloramphenicol acetyltransferases and *aac6-Ib* amikacin  
159 resistance. These cassette genes were exclusively found in sewage integrons.

160  
161 **Occurrence of virulence factors (VFs).** To complement the characterization of ARGs we also screened  
162 metagenomic assemblies against the Virulence Factor Database (VFdb) [16]. Ninety nine out of 451 (~22%)  
163 VFs were detected in our samples. Specifically, VFs were found in 7 out of 8 (87.5%) sewage samples and 4  
164 out of 12 (33%) beach samples. Sewage samples also presented a higher count and diversity of VFs compared  
165 to beach samples (Additional file 5: Fig. S3A). The functional classification of these VFs showed that those  
166 involved in bacterial motility, cell adherence, iron uptake and secretion were predominant among sewage  
167 samples. Interestingly, we found the presence of the ShET2 enterotoxin (*senB*) in a single sewage sample. We  
168 also examined the taxonomic distribution of these VFs and found that they are predominantly distributed in  
169 *Pseudomonas*, *Salmonella*, *Escherichia*, *Yersinia* and *Shigella*, among others (Additional file 5: Fig. S3B).  
170 These results highlight the importance of urban waters as reservoir and vehicle for VFs responsible of  
171 determining well-known pathogenic mechanism in clinically relevant bacteria.

172  
173 **Taxa carrying mobile ARGs and VFs are sewage biomarkers.** We also aimed to identify bacterial taxa  
174 associated to sewage or beach that can explain the observed differences in the composition of the overall  
175 bacterial community and their ARGs and VFs repertoires. Then, we applied a linear discriminant analysis  
176 (LDA) and effect size estimation [17] to determine statistically significant taxa associated to beach or sewage.  
177 We summarized the results at the genus level and found 6 genera associated to the beach environment while  
178 47 genera were characteristic of the sewage environment (Fig. 4A). Interestingly, 10 out of 47 (~21%)  
179 sewage-associated genera comprise bacterial species that are well-known human pathogens, including  
180 *Aeromonas*, *Acinetobacter*, *Arcobacter*, *Citrobacter*, *Enterobacter*, *Klebsiella*, *Pseudomonas*,

181 *Sphingobacterium*, *Stenotrophomonas* and *Streptococcus* (Fig. 4B). Most of these taxa match with those  
182 found carrying mobile ARGs and VFs.

183  
184 **Identification of pathogenic genotypes.** To gain further insight on the microbiological risks in these  
185 environments, we attempted to resolve the presence of previously reported pathogens at the strain level using  
186 metagenome-derived multilocus sequence typing (MLST) [18,19]. Despite the fact that this method was  
187 unable to identify complete previously reported sequence types (STs), the detection of partial allele  
188 combinations allowed us to infer the presence of several genotypes of clinical importance. In sewage samples  
189 we found three alleles of *Citrobacter freundii* whose combination determines the ST-209, which has been  
190 detected from isolates recovered from diarrheal patients [20]. Also, we detected three alleles from *Escherichia*  
191 *coli* defining the clonal complex ST-131, which is a globally disseminated multidrug-resistant clone  
192 associated with human extraintestinal (urinary and bloodstream) infections [21]. Furthermore, the detection of  
193 two alleles of *Arcobacter cryaerophilus* defined the presence of ST-392, a recently characterized genotype  
194 causative of persistent diarrhea [22]. We also identified several *Salmonella* alleles that diverged from known  
195 genotypes, preventing the inference of putative STs. Many unknown alleles of *Pseudomonas fluorescens* were  
196 also identified both in sewage and beach samples. This species is mainly associated to food spoilage but has  
197 been sporadically reported as an opportunistic human pathogen causing systemic infections associated to the  
198 consumption of animal byproducts [23]. Overall, these results indicate the presence of pathogenic genotypes  
199 in urban waters of Montevideo.

200  
201 **Discussion**

202  
203         Pharmaceutical products, including antibiotics, can be only partially metabolized by humans so  
204 these compounds or their derived metabolites are excreted [24] lastly reaching the environment. Sewage pipes  
205 have been largely considered as passive water transport systems, but recent studies uncovered hotspots of  
206 microbial diversity and activity in these urban environments. Indeed, the sewage system is the first step of  
207 city wastewater cycle and thus the most likely place where excreted antibiotic residues can induce the  
208 emergence of antibiotic resistant bacteria [25]. This is particularly relevant since recent studies have  
209 demonstrated that microbial communities present in the sewage recapitulate those found in the human gut  
210 microbiome [10]. Consequently, the exposure of human-derived bacteria to environmental pressures  
211 facilitates the emergence and spread of antibiotic resistant pathogens that can transmit and impact  
212 population's health [26].

213         The characterization of urban waters in our capital city revealed a remarkably distinct taxonomic  
214 composition of bacterial communities found in sewage and beach environments, suggesting that the sewage  
215 system is efficient in evacuating most hazardous microorganisms far away from areas of human exposure.  
216 Indeed, the vast majority of virulence and antibiotic resistance mechanisms associated to clinically relevant

217 pathogens were found in the sewage but not in beach samples. However, a more dense and longitudinal  
218 sampling is necessary to further characterize the dynamics of hazardous microorganisms circulating in these  
219 environments. Also, the comparison with metagenomes from hospital effluents along the city would provide a  
220 detailed picture of how nosocomial pathogens are being dispersed through the environment.

221 Indeed, many clinically relevant ARGs that we found in the city environment such as  
222 carbapenemases and ESBLs, have been frequently reported in nosocomial infections in Uruguay during the  
223 last decade [27–30]. This indicates that important antibiotic-resistant pathogens are being somehow  
224 transmitted among clinical settings and the urban environment, representing a public health threat. However,  
225 other ARGs such as metallo- $\beta$ -lactamases that have also been reported in Uruguay [31–34] were not found in  
226 the sewage or beaches. Beyond technical biases are possible, this can be attributed to a differential capacity  
227 between distinct antibiotic-resistant clones to survive and spread in the environment; given that selective  
228 fitness of antibiotic-resistant pathogens (adapted to high antibiotic pressures in hospital settings) may be  
229 lower in less-exposed environmental waters [35].

230 In this sense, despite the urban environment may not be directly exposed to similar concentrations  
231 of antibiotics than those used to treat infections, sewage systems have been recognized as ARG reservoirs. So,  
232 considering that we found most environmental ARGs typically widespread in enterobacterial plasmids and  
233 that clinically relevant integrons were fundamentally recovered from sewage samples, genetic platforms for  
234 horizontal gene transfer can be playing a relevant role as reservoir of ARGs. Additionally, plasmids and  
235 integrons are prone to recombination [36] and genetic plasticity of certain bacteria has been proved to  
236 increase under subinhibitory pressures (as those probably found in the environment) with certain antibiotics  
237 [37], so the city sewage should be also considered as a birthplace for new antibiotic resistance mosaics  
238 mediated by recombination and horizontal gene transfer.

239 Regarding this, we were able to identify internationally disseminated pathogens like the *E. coli* ST-  
240 131 clonal complex, which encompasses multidrug-resistant genotypes with great capacity of recruiting new  
241 resistance genes. Also, we uncovered the presence of clinically underestimated bacteria like *Arcobacter*  
242 *cryaerophilus*, which is today considered an emerging waterborne pathogen and whose resistance to third  
243 generation cephalosporins has been already reported [38]. So, the compositional complexity of urban waters  
244 where different genotypes and gene repertoires can coexist within a fluctuating bacterial community, opens  
245 the possibility of using environmental samples to monitor population's health. Accordingly, beyond providing  
246 a detailed characterization of individual virulence and antibiotic resistance mechanisms, our study supports  
247 the possibility of using high-resolution metagenomics to study the epidemiological dynamics of antibiotic-  
248 resistant pathogens using urban waters as a proxy at the population-level.

249

250 **Conclusion**

251

252 Our study represents a cross-sectional analysis of a metropolitan area encompassing more than 2.2  
253 million inhabitants and, to the best of our knowledge, constitutes the first work using metagenomics to jointly  
254 characterize bacterial communities found in the sewage and beach waters of an entire city.

255 Our approach demonstrated its usefulness to identify antibiotic resistance determinants which were  
256 known to be present in nosocomial infections, as well as to uncover the presence of globally-widespread or  
257 underestimated pathogens with strain-level resolution. We consider that future longitudinal studies (time-  
258 wise) will be useful to monitor the fluctuations of bacterial communities, allowing the development of  
259 associative models with relevant metadata like outbreak information, rainfall or antibiotic prescription and  
260 stewardship.

261 The data generated in this initial study represent a baseline metagenomic characterization of  
262 environmental waters of Montevideo, which will be useful to guide future efforts to implement systematic  
263 studies aiming to evaluate antibiotic-resistant pathogen dynamics through time and space across different  
264 cities. This information can be later incorporated to improve public health surveillance for antibiotic-resistant  
265 pathogens.

266

## 267 **Methods**

268

269 **Sample collection.** We collected 20 water samples from 12 beaches and 8 sewage pipes or creeks where  
270 wastewater from the sewage system is poured directly. These sampling points are distributed along the whole  
271 coastal line of Montevideo, an uninterrupted system of sandy beaches that spans more than 20 kms (Fig. 1C,  
272 Additional file 2: Table S1). The samples were collected all the same day (around 3 hours elapsed from the  
273 first to the last). All samples were collected using sterile 200 mL plastic bottles and conserved in ice until they  
274 were processed within the same day.

275

276 **DNA purification and metagenomic sequencing.** Each sample was centrifuged at 10,000 g for 15 min at 4  
277 °C. Supernatants were discarded and pellets were processed using the FastDNA<sup>TM</sup> Spin Kit (MP Biomedicals)  
278 following the manufacturer's protocol. Paired end (2 × 125 bp) sequencing reads were generated on the  
279 Illumina HiSeq2500 machine, yielding in average 39.2 M (SD ± 5.4 M) reads per sample. On average 30.85  
280 M (SD ± 4.07 M) reads passed an initial filter and were used in all further analyses. Sequencing data was  
281 deposited at the Sequence Read Archive (SRA) repository under BioProject number XXXXX.

282

283 **Metagenomic data analysis.** Initial data quality inspection was performed with FastQC  
284 (<https://www.bioinformatics.babraham.ac.uk/projects/fastqc>) and then reads were filtered and trimmed using  
285 Trimmomatic [39] with the following parameters: LEADING:20, TRAILING:20, SLIDINGWINDOW:5:20,  
286 AVGQUAL:20 MINLEN:90. Resulting reads were used in downstream analyses. Characterization of



287 bacterial pathogens at the strain-level was performed with metaMLST [19], that tries to identify multilocus  
288 sequence typing alleles directly from metagenomic sequences.

289 First, an unbiased description of the variability among communities in sewage and beach was  
290 obtained by running Simka [13] with default parameters. Second, MetaPhlan2 [14] was used to identify  
291 species and to determine their relative abundances across samples. Beta diversities were calculated over  
292 taxonomic profiles using the Bray-Curtis distance as implemented in the Vegan R package [40] and alpha  
293 diversities were calculated using the Shannon index in the base R package [41].

294 Metagenomes were *de novo* assembled for each sample with MEGAHIT [42]. Then, contigs over 1  
295 kb. were retained and merged at 99% of identity using CD-HIT-EST [43]. Resulting contigs were secondary  
296 assembled using Minimus2 [44] requiring a minimum overlap of 100 bp. with at least 95% of identity at  
297 contig boundaries. Genes were predicted on the resulting contigs using Prodigal [45]. Antibiotic resistance  
298 and virulence genes were identified with Abricate (<https://github.com/tseemann/abricate>) by comparing  
299 contigs against CARD [15] and VFdb [16], respectively. Only hits with query coverage > 90% and sequence  
300 identity > 70% were kept.

301 Integrons were identified using IntegronFinder [46]. We used MAFFT [47] (with the L-INS-i  
302 option) to align the amino acid sequences of IntI genes recovered from metagenomes together with reference  
303 sequences of class 1 (IntI1, AAQ16665.1), class 2 (IntI2, AAT72891.1), class 3 (IntI3, AAO32355.1), class 4  
304 (IntI4, AAC 38424) and class 5 (IntI5, AAD 55407.2) integrases. The resulting alignment was used to build a  
305 phylogenetic tree with RAxML [48].

306

## 307 **References**

308

1. Robinson TP, Bu DP, Carrique-Mas J, Fèvre EM, Gilbert M, Grace D, et al. Antibiotic resistance is the quintessential One Health issue. *Trans R Soc Trop Med Hyg.* 2016;110:377-80.
2. Amos GCA, Zhang L, Hawkey PM, Gaze WH, Wellington EM. Functional metagenomic analysis reveals rivers are a reservoir for diverse antibiotic resistance genes. *Vet Microbiol.* 2014;171:441-7.
3. Murray A, Zhang L, Yin X, Zhang T, Buckling A, Snape J, et al. Novel insights into selection for antibiotic resistance in complex microbial communities. *bioRxiv.* 2018;323634.
4. Thompson LR, Sanders JG, McDonald D, Amir A, Ladau J, Locey KJ, et al. A communal catalogue reveals Earth's multiscale microbial diversity. *Nature.* 2017;551:457-63.
5. The MetaSUB International Consortium. The Metagenomics and Metadesign of the Subways and Urban Biomes (MetaSUB) International Consortium inaugural meeting report. *Microbiome.* 2016;4:24.
6. Afshinnkoo E, Meydan C, Chowdhury S, Jaroudi D, Boyer C, Bernstein N, et al. Geospatial resolution of human and bacterial diversity with city-scale metagenomics. *Cell Syst.* 2015;1:72-87.
7. Hervé V, Leroy B, Pires ADS, Lopez PJ. Aquatic urban ecology at the scale of a capital: community structure and interactions in street gutters. *ISME J.* 2018;12:253-66.

8. Amos GCA, Ploumakis S, Zhang L, Hawkey PM, Gaze WH, Wellington EMH. The widespread dissemination of integrons throughout bacterial communities in a riverine system. *ISME J.* 2018;12:681-91.
9. Mohiuddin MM, Salama Y, Schellhorn HE, Golding GB. Shotgun metagenomic sequencing reveals freshwater beach sands as reservoir of bacterial pathogens. *Water Res.* 2017;115:360-9.
10. Newton RJ, McLellan SL, Dila DK, Vineis JH, Morrison HG, Eren AM, et al. Sewage reflects the microbiomes of human populations. *mBio.* 2015;6:e02574-14.
11. Iraola G, Kumar N. Surveying what's flushed away. *Nat Rev Microbiol.* 2018;1.
12. Solo-Gabriele HM, Harwood VJ, Kay D, Fujioka RS, Sadowsky MJ, Whitman RL, et al. Beach sand and the potential for infectious disease transmission: observations and recommendations. *J Mar Biol Assoc UK.* 2016;96:101-20.
13. Benoit G, Peterlongo P, Mariadassou M, Drezen E, Schbath S, Lavenier D, et al. Multiple comparative metagenomics using multiset k-mer counting. *PeerJ Comput Sci.* 2016;2:e94.
14. Truong DT, Franzosa EA, Tickle TL, Scholz M, Weingart G, Pasolli E, et al. MetaPhlan2 for enhanced metagenomic taxonomic profiling. *Nat Methods.* 2015;12:902.
15. Jia B, Raphenya AR, Alcock B, Waglechner N, Guo P, Tsang KK, et al. CARD 2017: expansion and model-centric curation of the comprehensive antibiotic resistance database. *Nucleic Acids Res.* 2017;45:D566-73.
16. Chen L, Xiong Z, Sun L, Yang J, Jin Q. VFDB 2012 update: toward the genetic diversity and molecular evolution of bacterial virulence factors. *Nucleic Acids Res.* 2012;40:D641-5.
17. Segata N, Izard J, Waldron L, Gevers D, Miropolsky L, Garrett WS, et al. Metagenomic biomarker discovery and explanation. *Genome Biol.* 2011;12:R60.
18. Maiden MCJ, Bygraves JA, Feil E, Morelli G, Russell JE, Urwin R, et al. Multilocus sequence typing: a portable approach to the identification of clones within populations of pathogenic microorganisms. *Proc Natl Acad Sci USA.* 1998;95:3140-5.
19. Zolfo M, Tett A, Jousson O, Donati C, Segata N. MetaMLST: multi-locus strain-level bacterial typing from metagenomic samples. *Nucleic Acids Res.* 2017;45:e7.
20. Liu L, Lan R, Liu L, Wang Y, Zhang Y, Wang Y, et al. Antimicrobial resistance and cytotoxicity of *Citrobacter* spp. in Maanshan Anhui province, China. *Front Microbiol.* 2017;8:1357.
21. Petty NK, Zakour NLB, Stanton-Cook M, Skippington E, Totsika M, Forde BM, et al. Global dissemination of a multidrug resistant *Escherichia coli* clone. *Proc Natl Acad Sci USA.* 2014;111:5694-9.
22. Figueras MJ, Levican A, Pujol I, Ballester F, Quilez MR, Gómez-Bertomeu F. A severe case of persistent diarrhoea associated with *Arcobacter cryaerophilus* but attributed to *Campylobacter* sp. and a review of the clinical incidence of *Arcobacter* spp. *New Microbes New Infect.* 2014;2:31-7.
23. Gershman MD, Kennedy DJ, Noble-Wang J, Kim C, Gullion J, Kacica M, et al. Multistate outbreak of *Pseudomonas fluorescens* bloodstream infection after exposure to contaminated heparinized saline flush prepared by a compounding pharmacy. *Clin Infect Dis.* 2008;47:1372-9.
24. Jelic A, Rodriguez-Mozaz S, Barceló D, Gutierrez O. Impact of in-sewer transformation on 43 pharmaceuticals in a pressurized sewer under anaerobic conditions. *Water Res.* 2015;68:98-108.

25. Auguet O, Pijuan M, Borrego CM, Rodríguez-Mozaz S, Triadó-Margarit X, Giustina SVD, et al. Sewers as potential reservoirs of antibiotic resistance. *Sci Total Environ.* 2017;605:1047-54.
26. Baquero F, Martínez J-L, Cantón R. Antibiotics and antibiotic resistance in water environments. *Curr Opin Biotechnol.* 2008;19:260-5.
27. Vignoli R, Cordeiro NF, García V, Mota MI, Betancor L, Power P, et al. New TEM-derived extended-spectrum  $\beta$ -lactamase and its genomic context in plasmids from *Salmonella enterica* serovar derby isolates from Uruguay. *Antimicrob Agents Chemother.* 2006;50:781-4.
28. Vignoli R, Varela G, Mota MI, Cordeiro NF, Power P, Ingold E, et al. Enteropathogenic *Escherichia coli* strains carrying genes encoding the PER-2 and TEM-116 extended-spectrum  $\beta$ -lactamases isolated from children with diarrhea in Uruguay. *J Clin Microbiol.* 2005;43:2940-3.
29. García-Fulgueiras V, Bado I, Mota MI, Robino L, Cordeiro NF, Varela A, et al. Extended-spectrum  $\beta$ -lactamases and plasmid-mediated quinolone resistance in enterobacterial clinical isolates in the paediatric hospital of Uruguay. *J Antimicrob Chemother.* 2011;66:1725-9.
30. Medina-Presentado JC, Seija V, Vignoli R, Pontet J, Robino L, Cordeiro NF, et al. Polyclonal endemicity of *Acinetobacter baumannii* in ventilated patients in an intensive care unit in Uruguay. *Int J Infect Dis.* 2013;17:e422-7.
31. Ingold AJ, Castro M, Nabón A, Borthagaray G, Márquez C. VIM-2 metallo- $\beta$ -lactamase gen detection in a class 1 integron associated to bla(CTX-M-2) in a *Pseudomonas aeruginosa* clinical isolate in Uruguay: first communication. *Rev Argent Microbiol.* 2011;43:198-202.
32. Bado I, Papa-Ezdra R, Cordeiro N, Outeda M, Caiata L, García-Fulgueiras V, et al. Detection of qnrVC6, within a new genetic context, in an NDM-1-producing *Citrobacter freundii* clinical isolate from Uruguay. *J Glob Antimicrob Resist.* 2018;14:95-8.
33. Seija V, Medina Presentado JC, Bado I, Papa Ezdra R, Batista N, Gutierrez C, et al. Sepsis caused by New Delhi metallo- $\beta$ -lactamase (blaNDM-1) and qnrD-producing *Morganella morganii*, treated successfully with fosfomycin and meropenem: case report and literature review. *Int J Infect Dis.* 2015;30:20-6.
34. Vignoli R, Cordeiro N, Seija V, Schelotto F, Radice M, Ayala J, et al. Genetic environment of CTX-M-2 in *Klebsiella pneumoniae* isolates from hospitalized patients in Uruguay. *Rev Argent Microbiol.* 2006;38:84-8.
35. Hall AR, Angst DC, Schiessl KT, Ackermann M. Costs of antibiotic resistance – separating trait effects and selective effects. *Evol Appl.* 2015;8:261-72.
36. Mazel D. Integrons: agents of bacterial evolution. *Nat Rev Microbiol.* 2006;4:608-20.
37. López E, Blázquez J. Effect of subinhibitory concentrations of antibiotics on intrachromosomal homologous recombination in *Escherichia coli*. *Antimicrob Agents Chemother.* 2009;53:3411-5.
38. Ferreira S, Oleastro M, Domingues F. *Arcobacter* spp. in food chain—from culture to omics. In: *Foodborne Pathogens and Antibiotic Resistance.* Wiley-Blackwell. 2017;73-117.
39. Bolger AM, Lohse M, Usadel B. Trimmomatic: a flexible trimmer for Illumina sequence data. *Bioinformatics.* 2014;30:2114-20.
40. Oksanen J. *Vegan: R functions for vegetation ecologists.* 2005. Available from: <https://cran.r-project.org/web/packages/vegan/index.html>.

41. R Development Core Team. R: a language and environment for statistical computing. R Foundation for Statistical Computing. 2008. Available from: <http://www.R-project.org>.
42. Li D, Liu C-M, Luo R, Sadakane K, Lam T-W. MEGAHIT: an ultra-fast single-node solution for large and complex metagenomics assembly via succinct de Bruijn graph. *Bioinformatics*. 2015;31:1674-6.
43. Fu L, Niu B, Zhu Z, Wu S, Li W. CD-HIT: accelerated for clustering the next-generation sequencing data. *Bioinformatics*. 2012;28:3150-2.
44. Treangen TJ, Sommer DD, Angly FE, Koren S, Pop M. Next generation sequence assembly with AMOS. *Curr Protoc Bioinformatics*. 2011;11.
45. Hyatt D, Chen GL, LoCascio PF, Land ML, Larimer FW, Hauser LJ. Prodigal: prokaryotic gene recognition and translation initiation site identification. *BMC Bioinformatics*. 2010;11:119.
46. Cury J, Jové T, Touchon M, Néron B, Rocha EP. Identification and analysis of integrons and cassette arrays in bacterial genomes. *Nucleic Acids Res*. 2016;44:4539-50.
47. Katoh K, Standley DM. MAFFT Multiple sequence alignment software version 7: improvements in performance and usability. *Mol Biol Evol*. 2013;30:772-80.
48. Stamatakis A. RAxML version 8: a tool for phylogenetic analysis and post-analysis of large phylogenies. *Bioinformatics*. 2014;30:1312-3.

309

## 310 **Figure legends**

311

312 **Figure 1. Community composition of beach and sewage waters of Montevideo.** A) Heatmap showing a  
313 clustering analysis based on k-mer distances evidencing a complete separation between sewage (red) and  
314 beach (blue) samples. B) Clustering analysis separating sewage (red) from beach (blue) samples obtained by  
315 comparing beta diversities (dissimilarity between samples) calculated from relative abundance profiles of  
316 bacterial species. C) Sampling points along the coast of Montevideo (grey shade). Sewage water samples are  
317 in red and beach water samples are in blue.

318

319 **Figure 2. Occurrence of antibiotic resistance mechanisms.** A) Circos representation showing the presence  
320 of ARGs across sewage (red) or beach (blue) samples. Links are drawn when a certain ARG (right blocks) is  
321 found in a certain sample (left blocks). Genes are colored according to antibiotic classes. Barplots above each  
322 left side block indicate the alpha diversity of ARGs within each sample. B) Boxplots showing ARG counts for  
323 different antibiotic classes in beach (blue) and sewage (red) samples.

324

325 **Figure 3. Distribution of ARGs in mobile genetic elements.** A) Barplot showing the frequency of ARGs in  
326 bacterial chromosomes (yellow) or plasmids (violet) summarized by antibiotic class. B) Taxonomic  
327 distribution of bacterial plasmids carrying ARGs found in urban metagenomes. C) Phylogeny of reference  
328 integrase genes (grey) and those recovered from beach (blue) and sewage (red) samples.

329  
330 **Figure 4. Identification of sewage biomarker taxa.** A) Barplots showing LDA (Linear Discrimination  
331 Analysis) scores for bacteria genera that distinguish beach (blue) from sewage (red) samples. B) Boxplots  
332 comparing relative abundances between beach (blue) and sewage (red) samples for bacterial genera enclosing  
333 pathogenic species.

334

335 **Declarations**

336

337 **Ethics approval and consent to participate.** Not applicable.

338

339 **Consent for publication.** Not applicable.

340

341 **Availability of data and material.** All data generated during this study is available at the Sequence Read  
342 Archive (SRA) under BioProject number XXXXX.

343

344 **Competing interests.** The authors declare that they have no competing interests.

345

346 **Funding.** This work was funded by the Agencia Nacional de Investigación e Innovación (ANII) grant number  
347 OPR\_X\_2016\_1\_1006944.

348

349 **Author's contributions.** GI and GG conceived the idea. BD, EA and CM generated the data. PF, VA, CS,  
350 MG and GI analyzed and interpreted the data. PF, VA, CS, GG and GI wrote the manuscript. All authors read  
351 and approved the final manuscript.

352

353 **Acknowledgements.** We thank technicians from Intendencia de Montevideo for valuable assistance during  
354 sampling and data collection. We thank Hugo Naya for providing lab space and computational resources at  
355 the Bioinformatics Unit in the Institut Pasteur Montevideo during the development of this work.

356

357

358

359

360

361

362

363

364

365

366

367

368

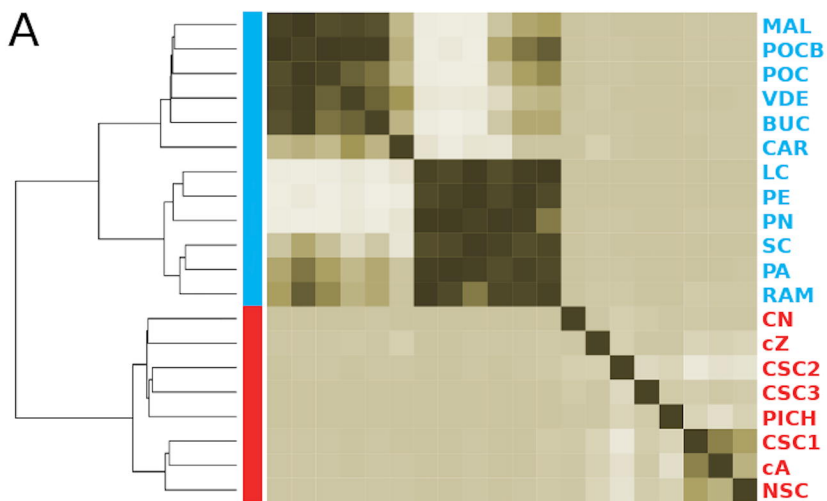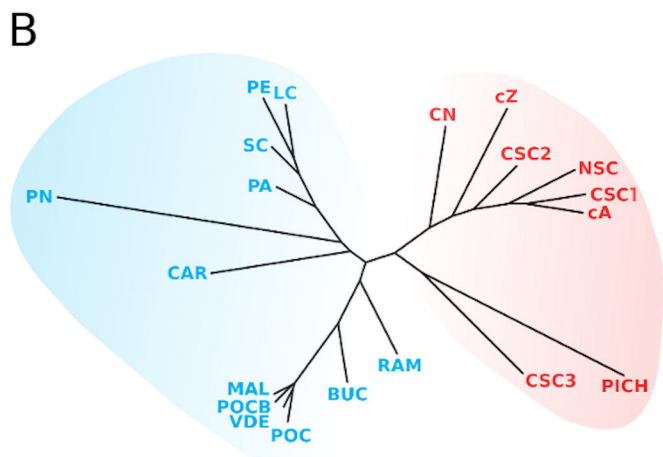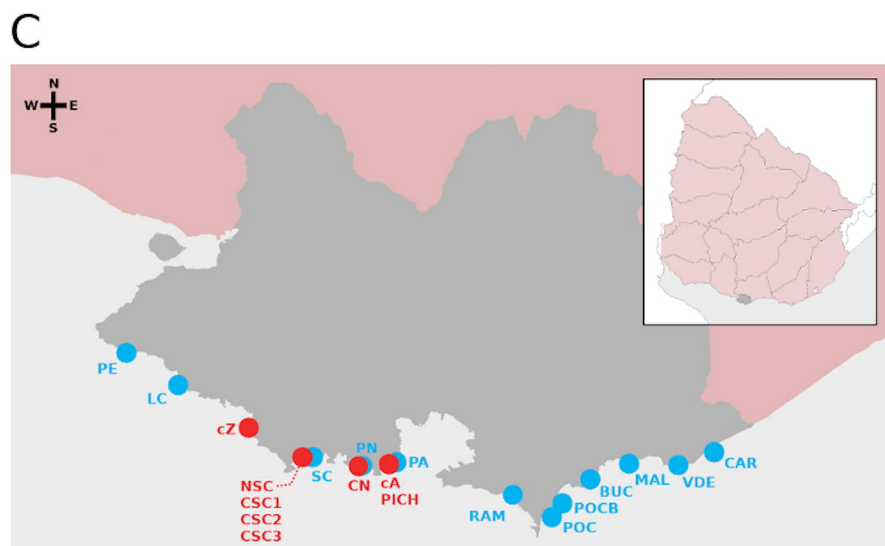

A

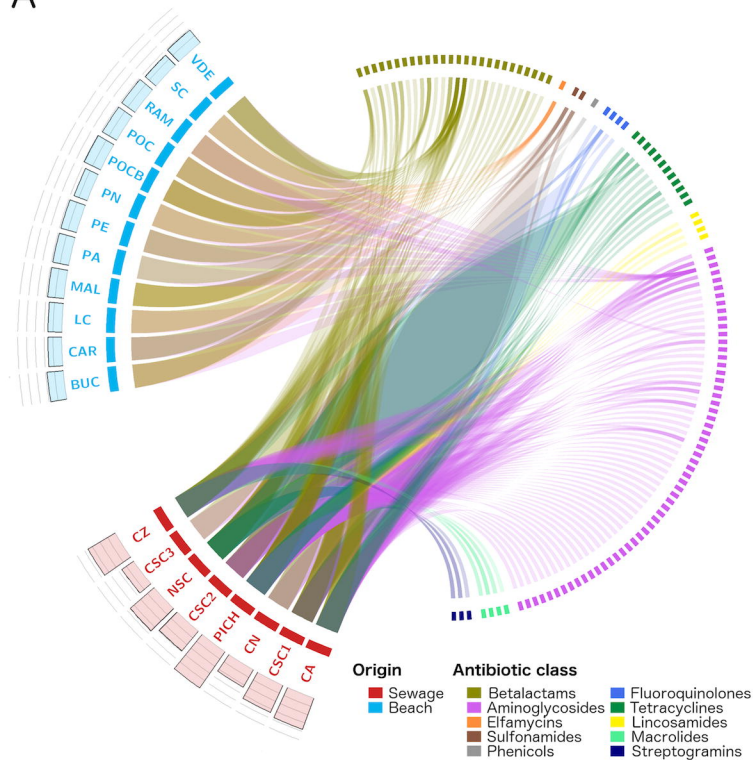

B

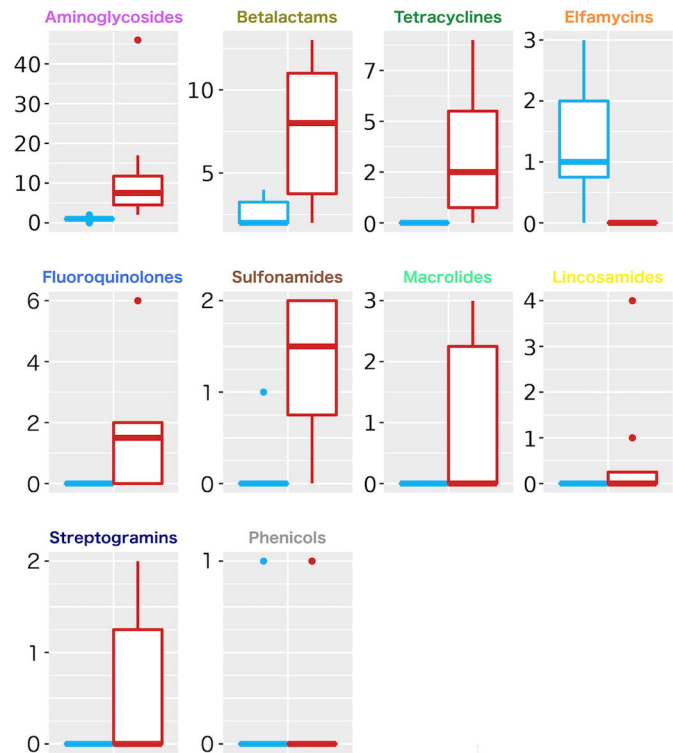



A

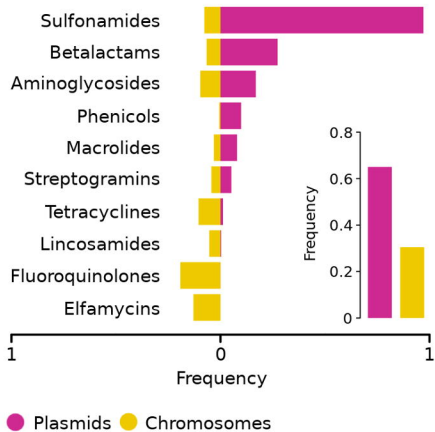

B

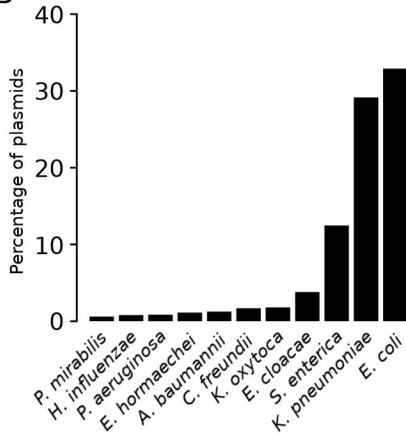

C

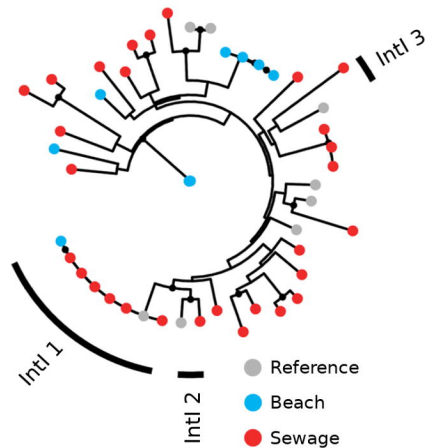

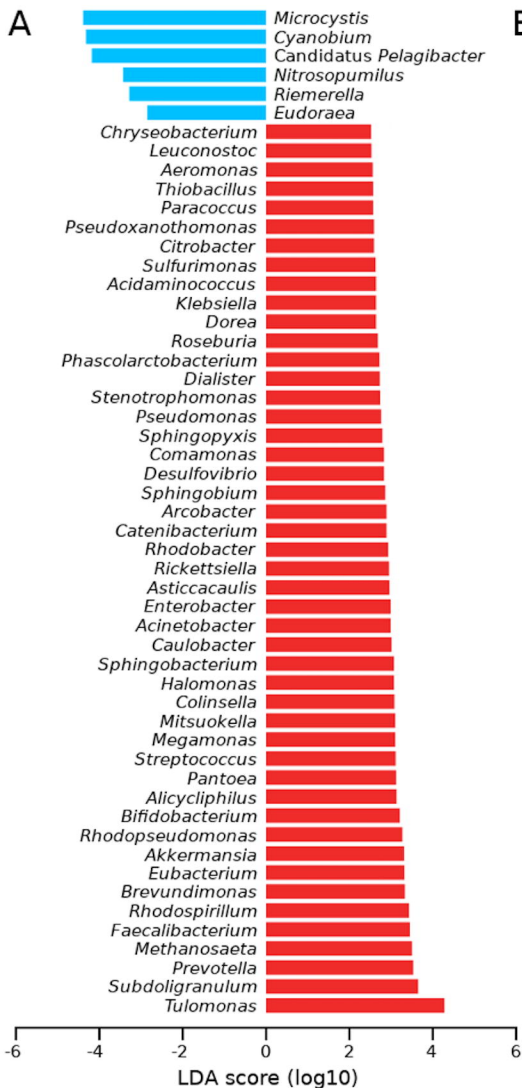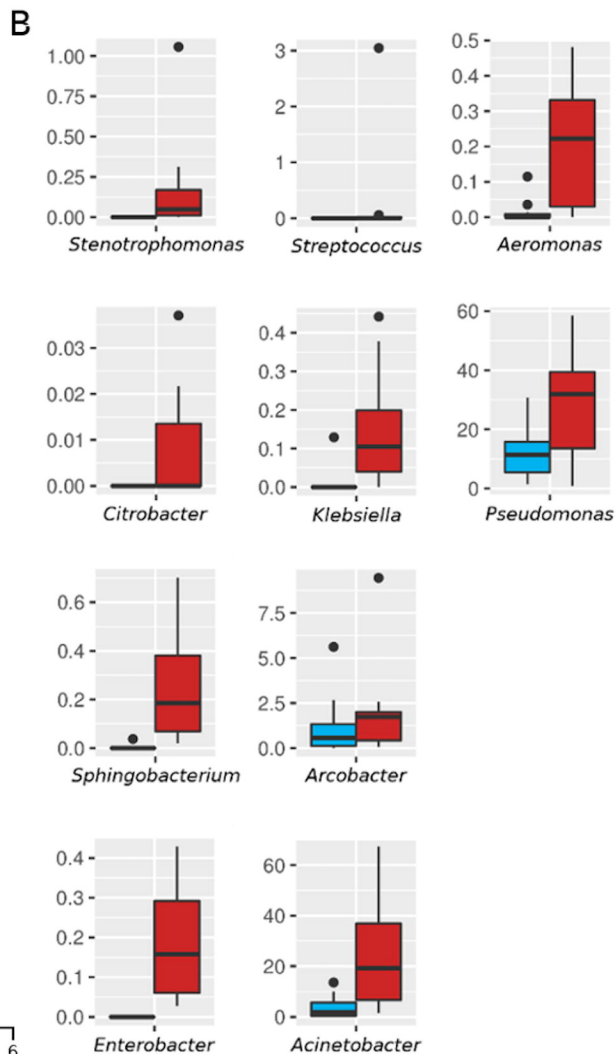

Source: https://www.biorxiv.org/content/biorxiv/early/2018/10/31/456517.full.pdf
